# Supplementary figures and images for: Targeting of GSDMD sensitizes HCC to anti-PD-1 by activating cGAS pathway and downregulating PD-L1 expression
Source: HighWire-hosted journal article supplement (doi:10.1136/jitc-2022-004763), 2022-06-01

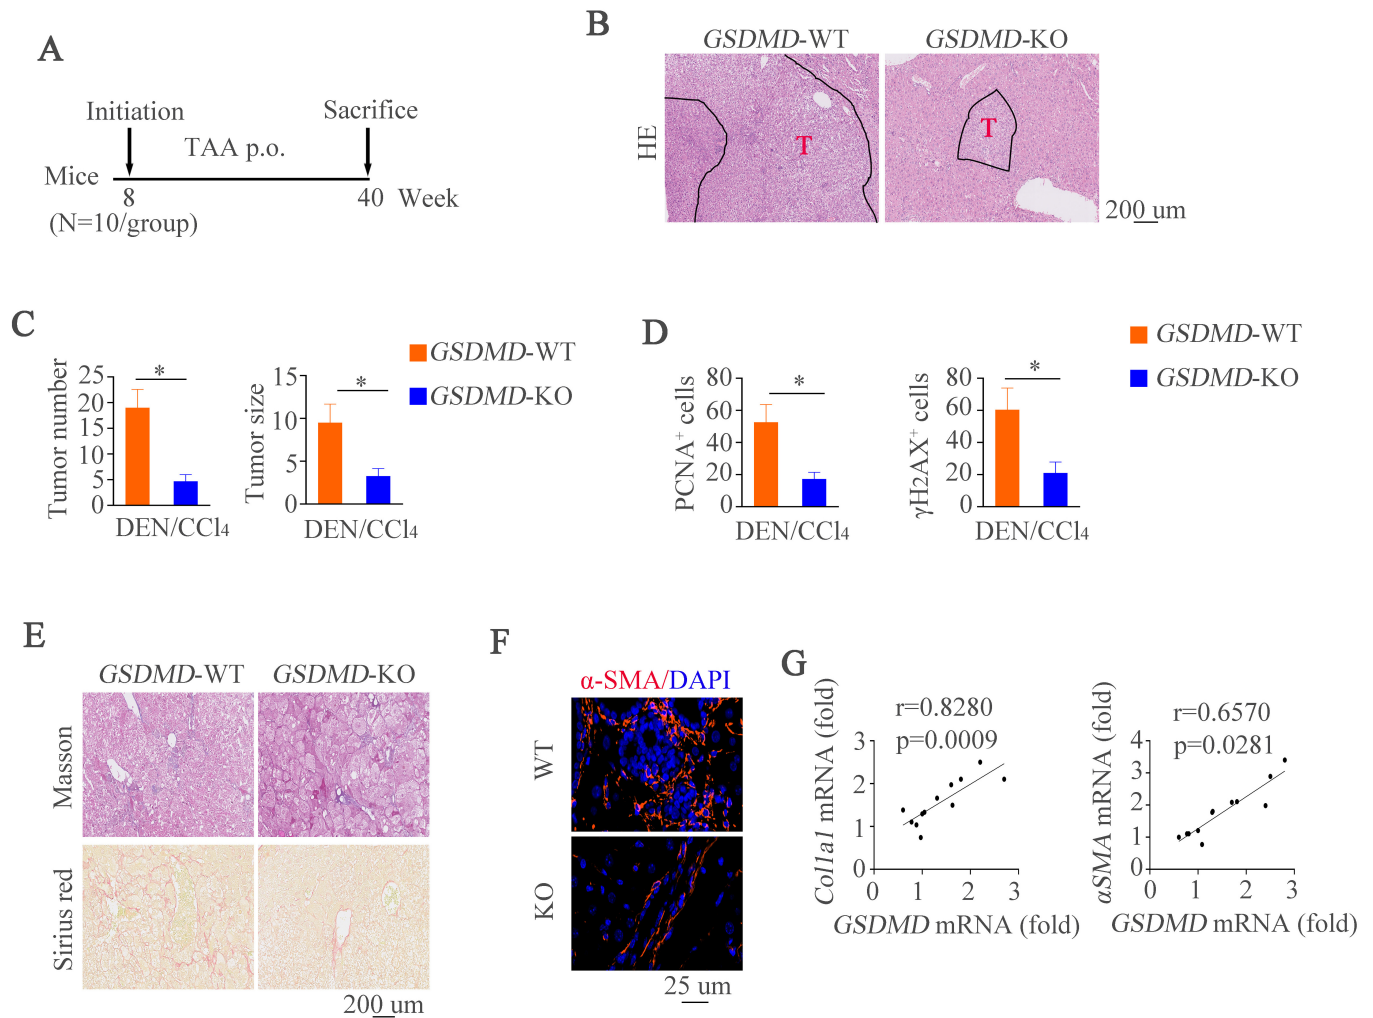

Supplement: jitc-2022-004763supp003_data_supplement.pdf [file jitc-2022-004763supp003_data_supplement.pdf]

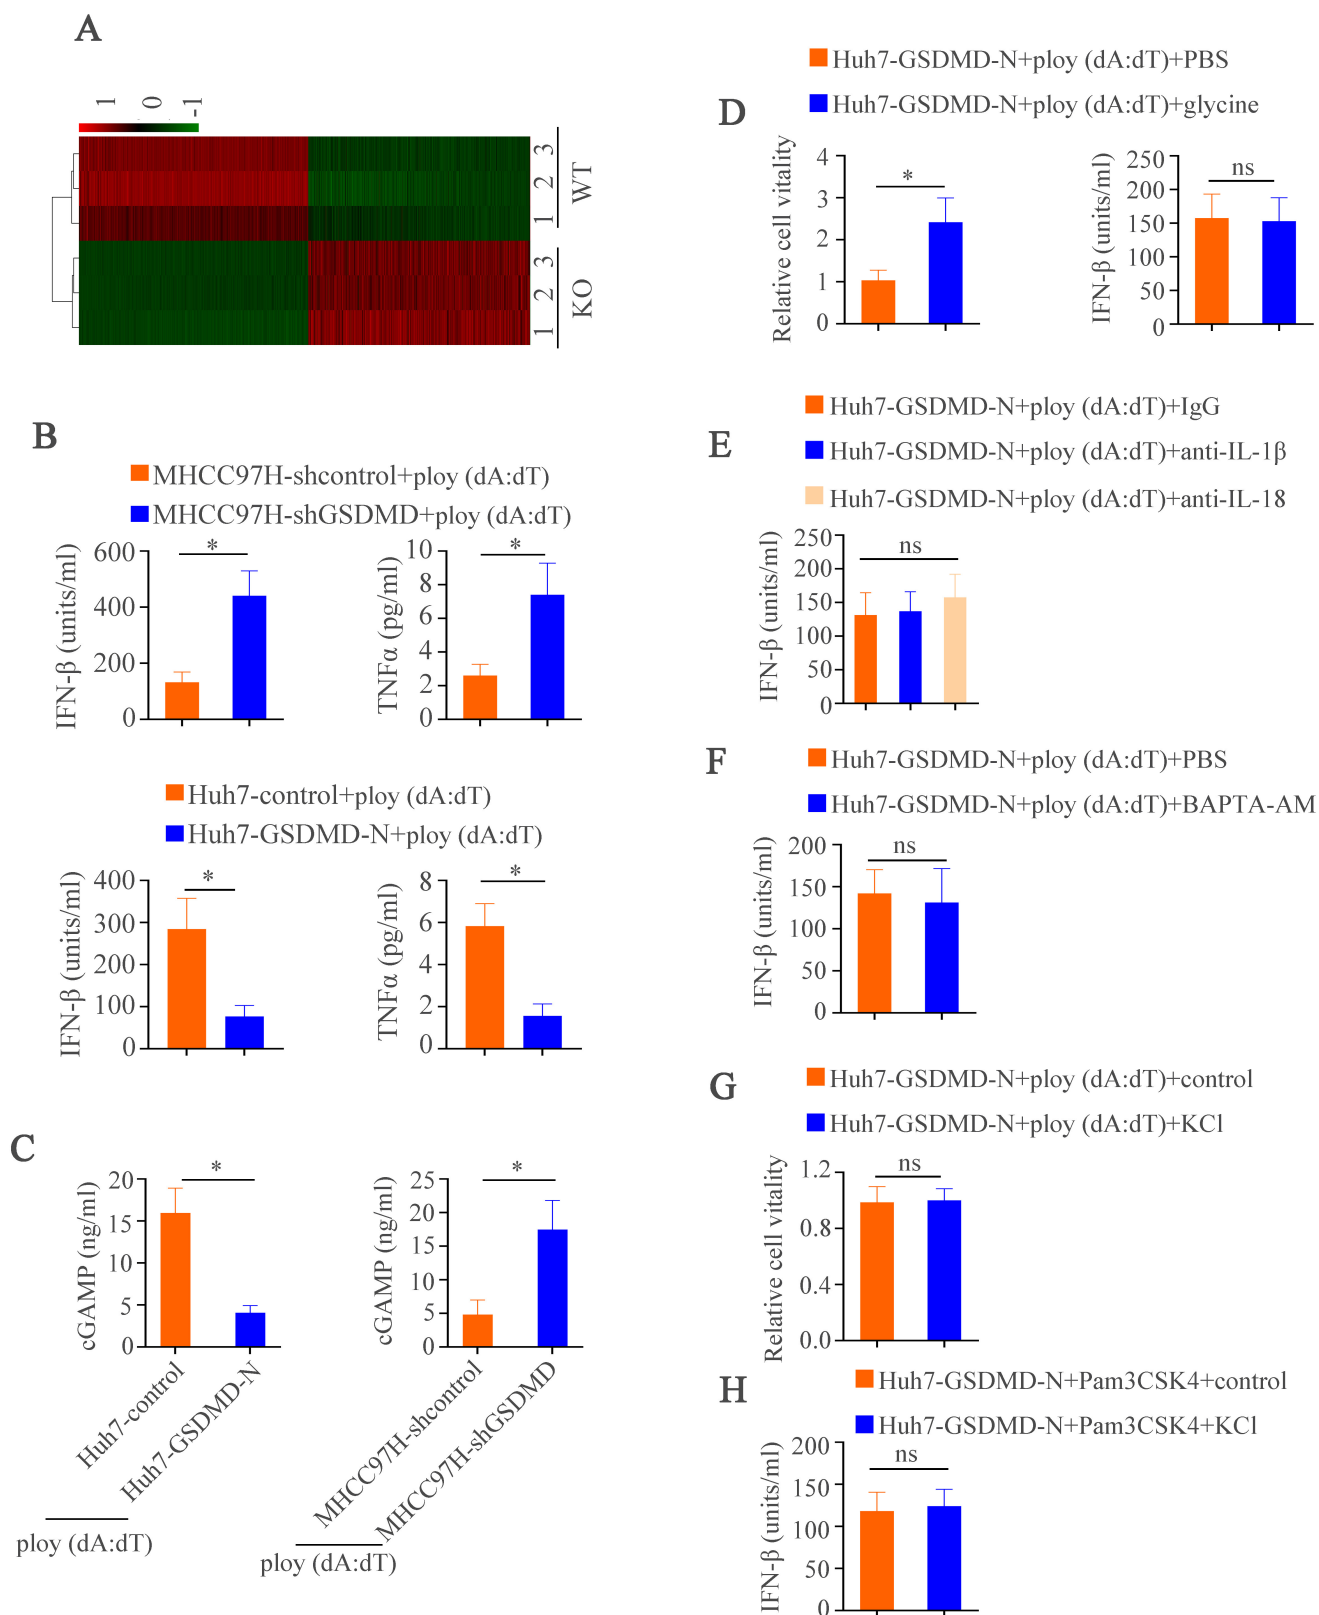

Supplement: jitc-2022-004763supp004_data_supplement.pdf [file jitc-2022-004763supp004_data_supplement.pdf]

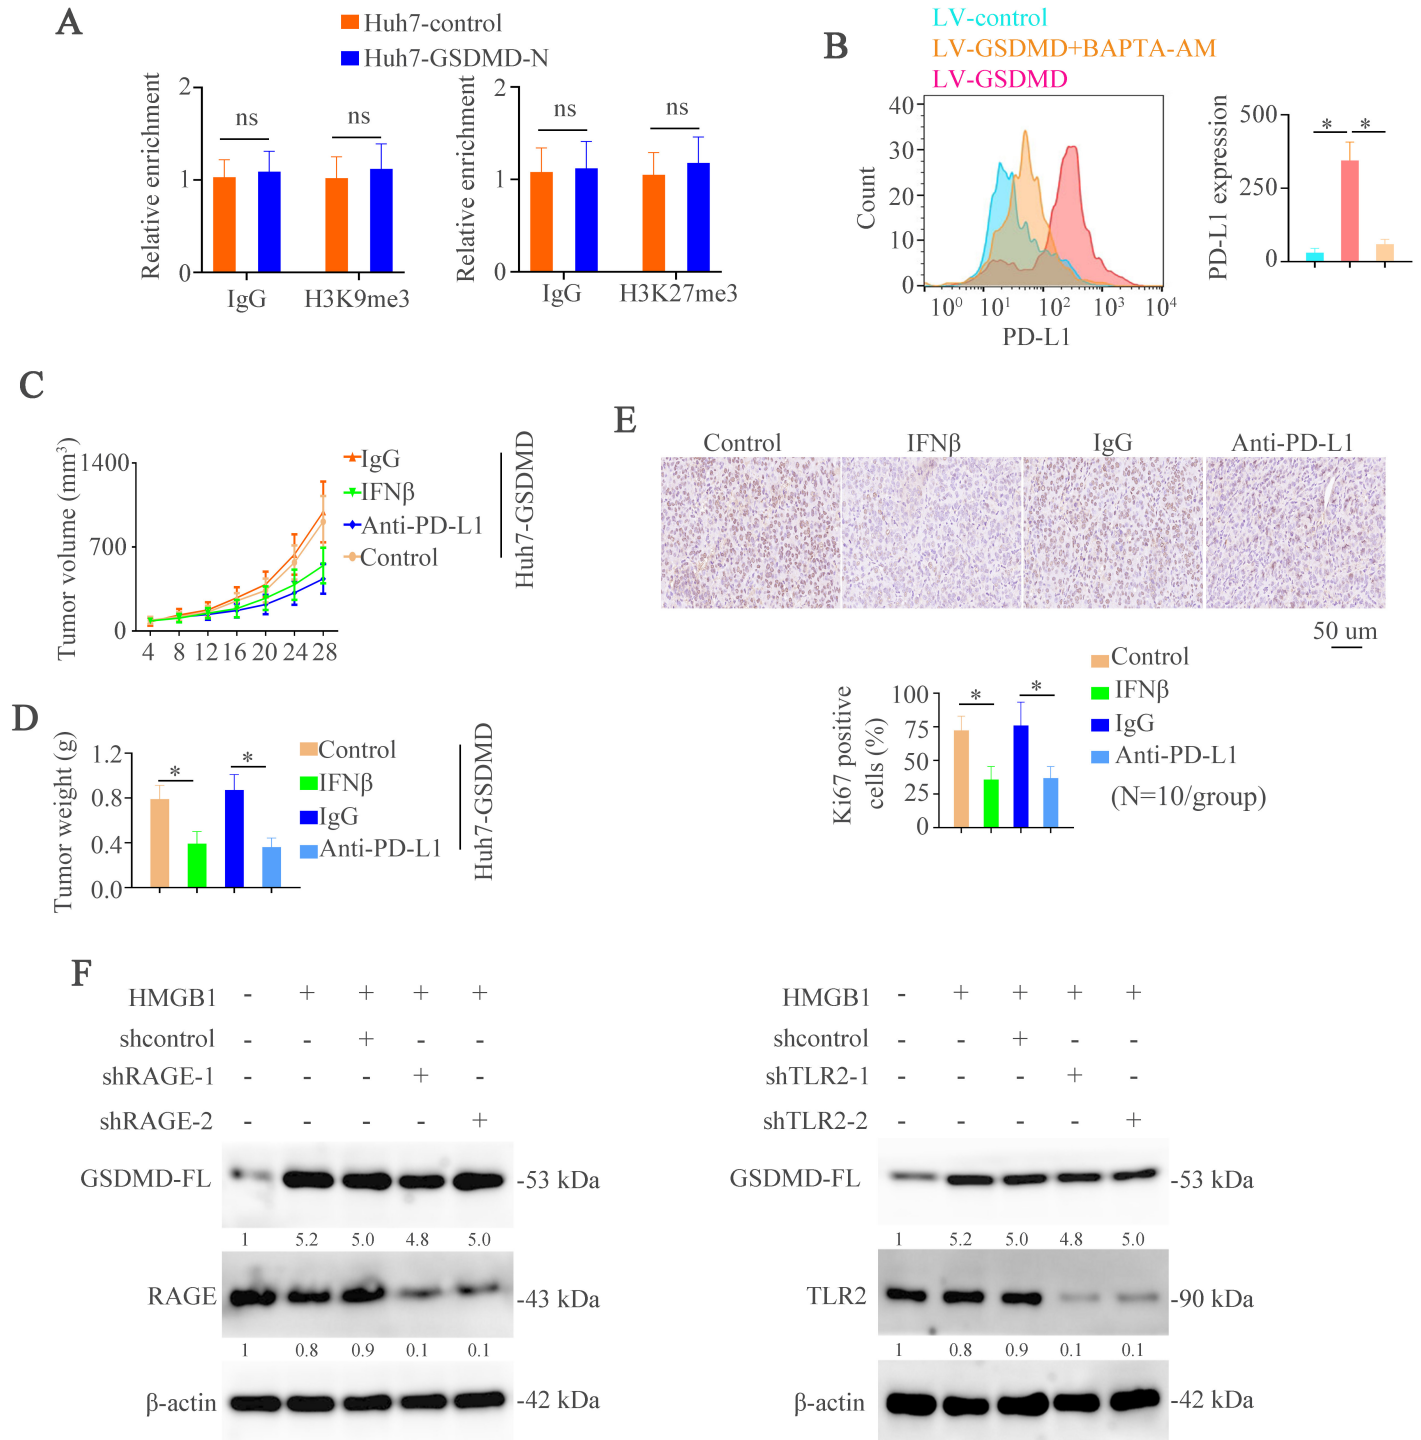

Supplement: jitc-2022-004763supp006_data_supplement.pdf [file jitc-2022-004763supp006_data_supplement.pdf]

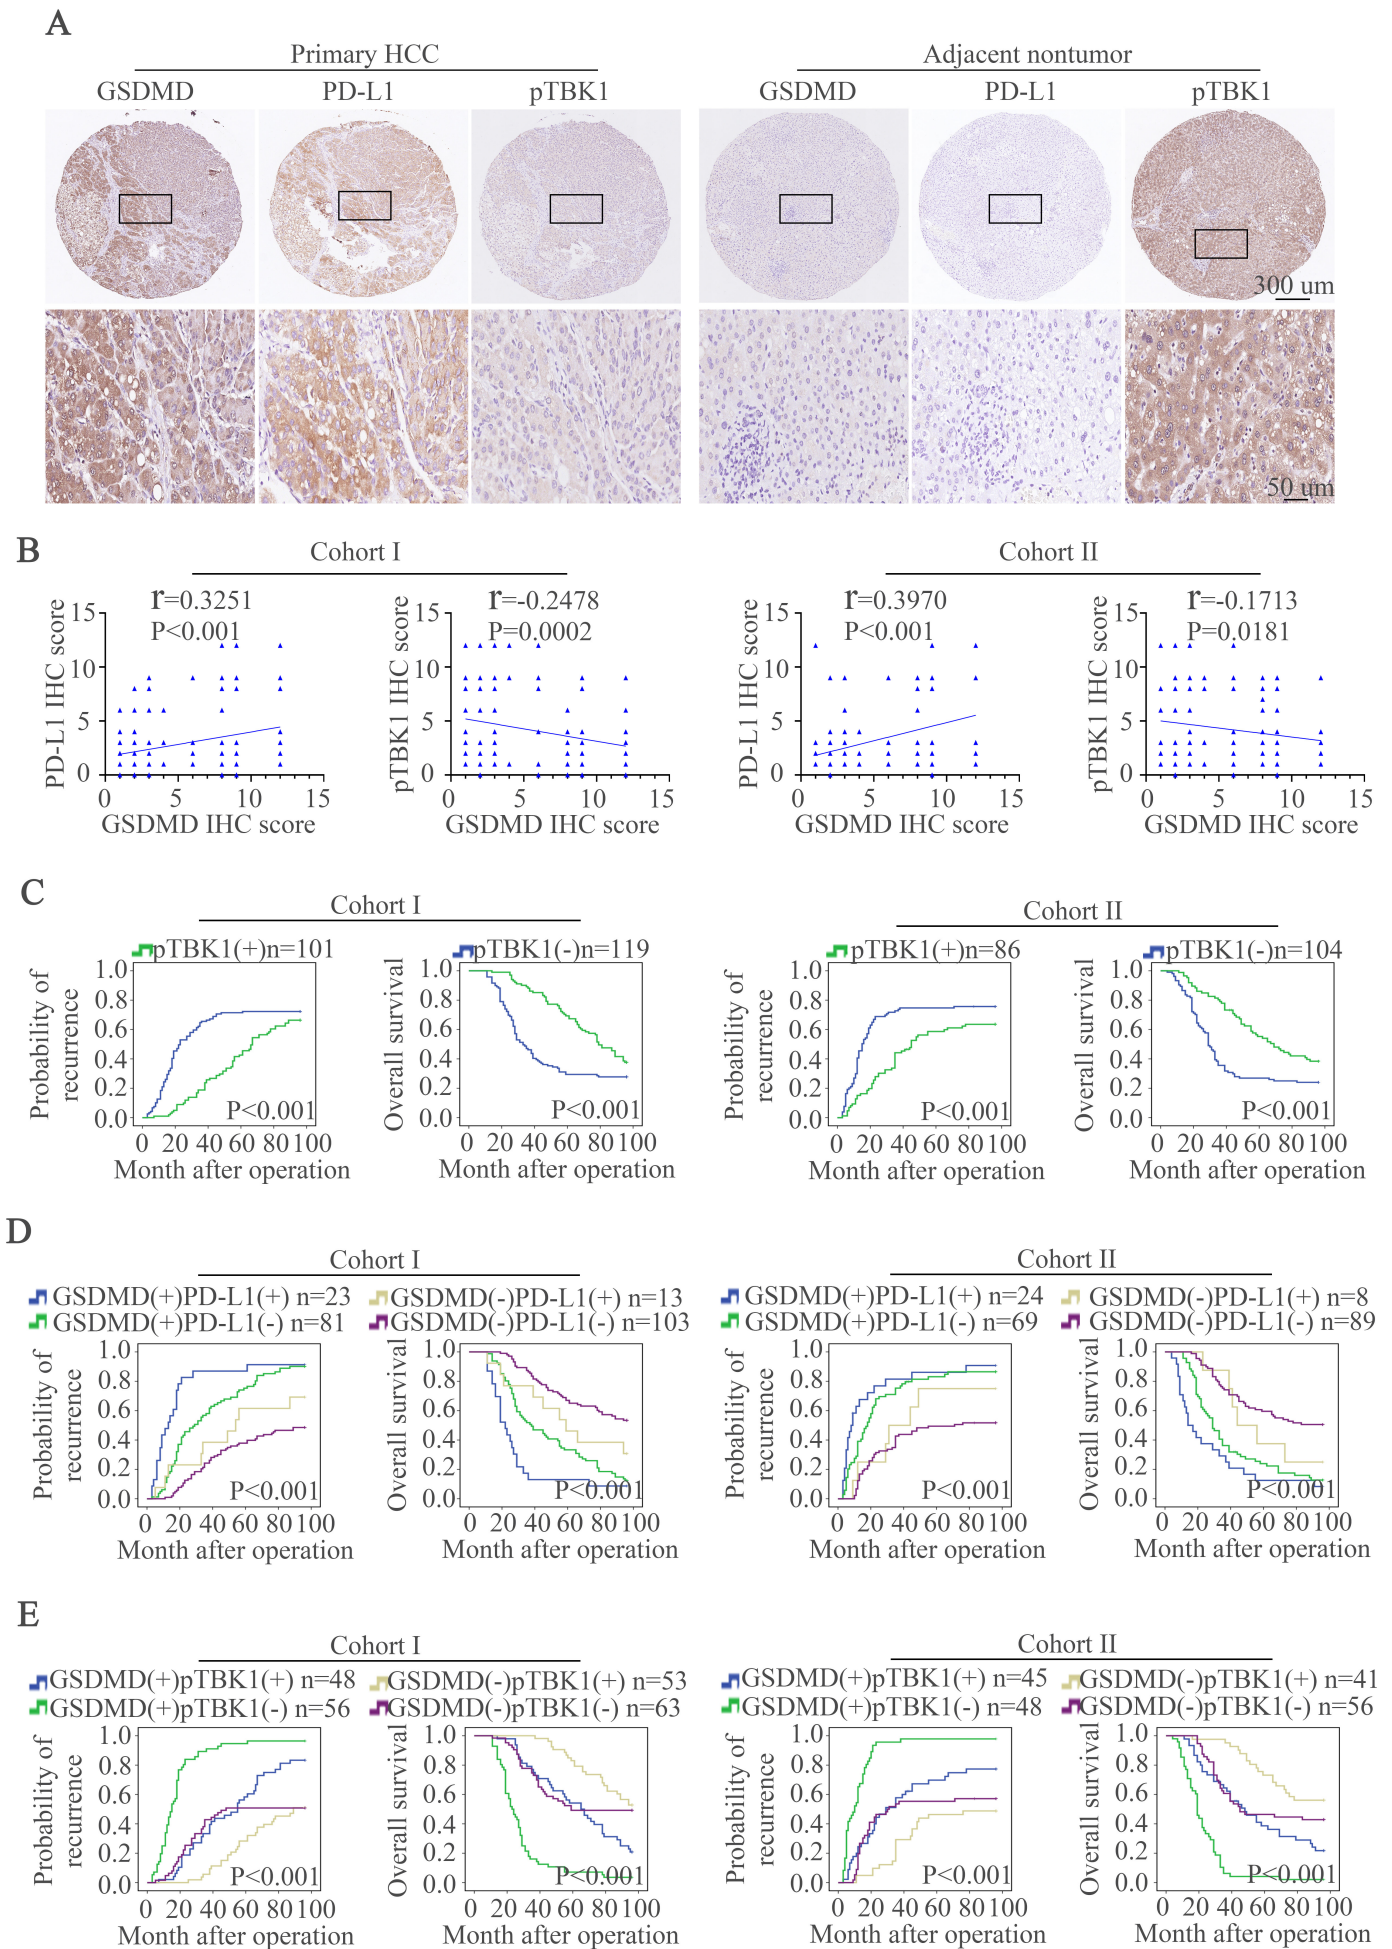

Supplement: jitc-2022-004763supp007_data_supplement.pdf [file jitc-2022-004763supp007_data_supplement.pdf]

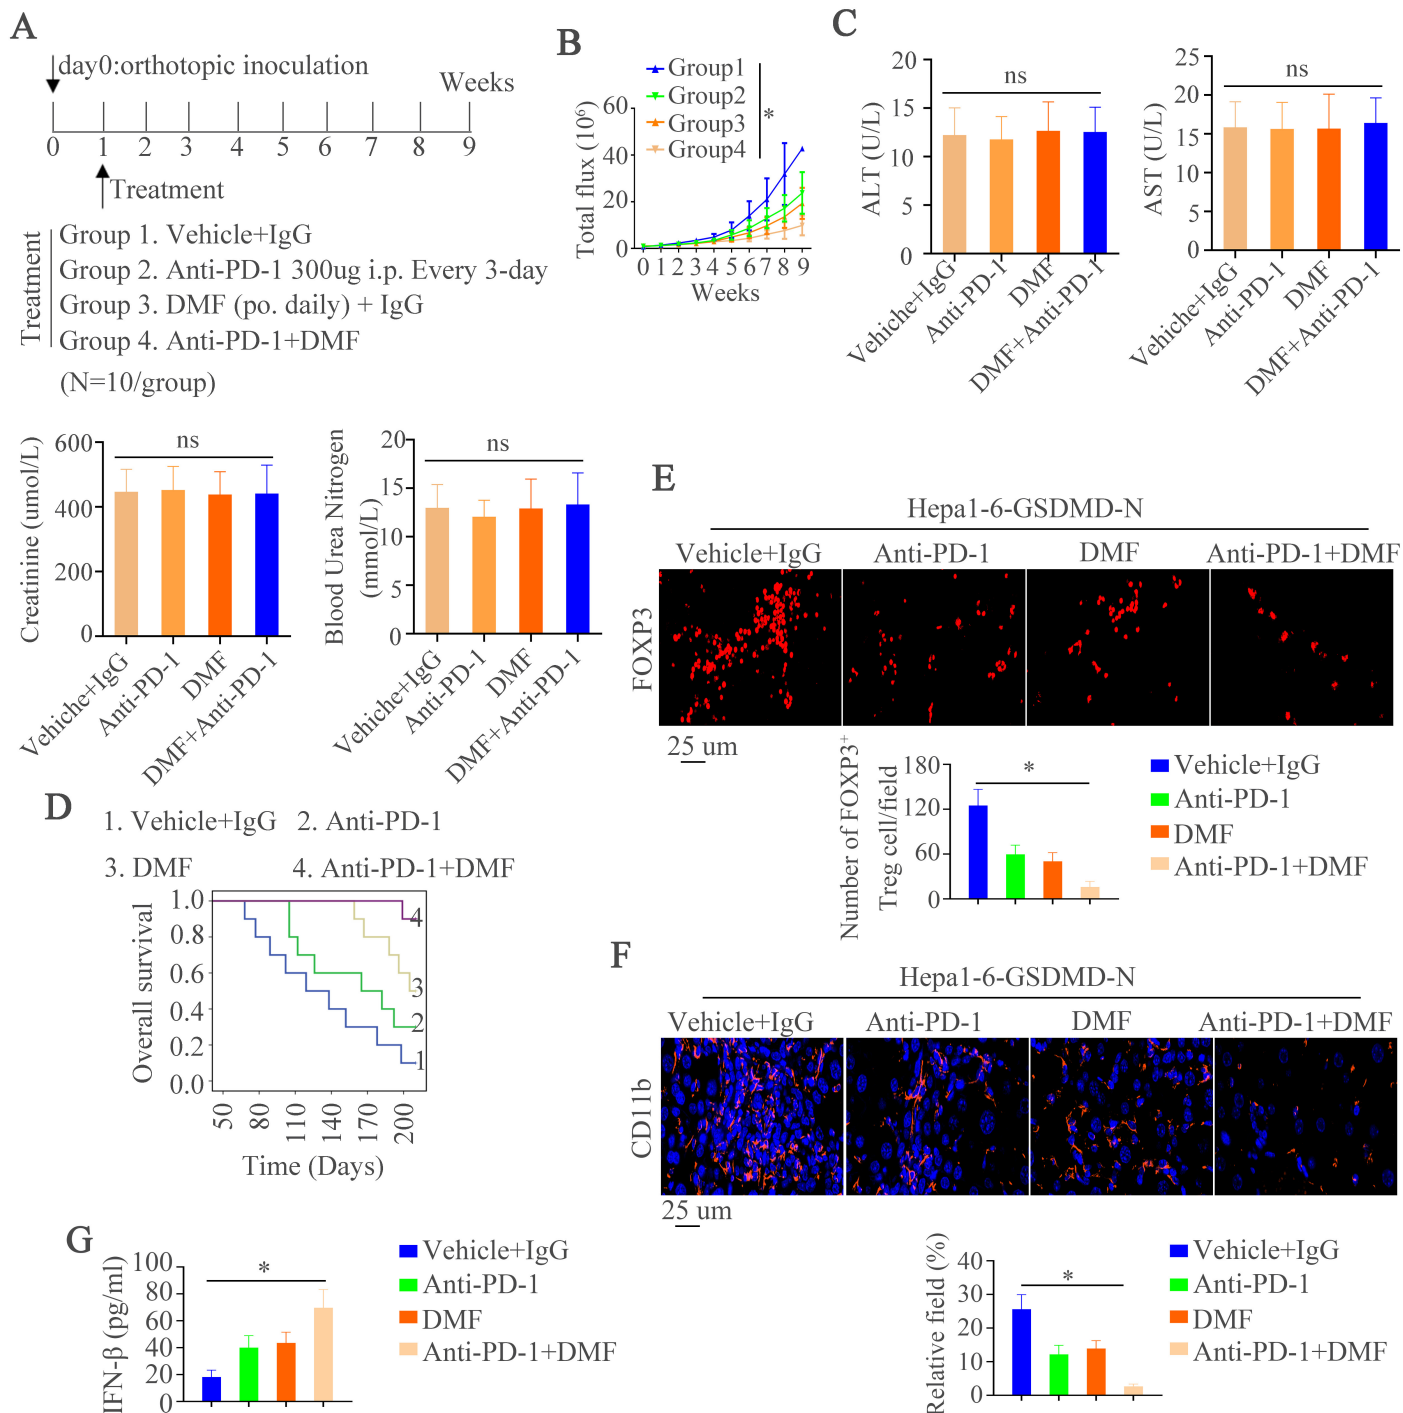

Supplement: jitc-2022-004763supp009_data_supplement.pdf [file jitc-2022-004763supp009_data_supplement.pdf]
